# Supplementary material for: The genetic basis and fitness consequences of sperm midpiece size in deer mice
Source: PubMed Central journal article supplement (PMC5146288; doi:10.1038/ncomms13652), 2016-12-02
Supplement: ncomms13652-s2.pdf [file ncomms13652-s2.pdf]

## **PEER REVIEW FILE**

Transferred manuscripts:

Editorial Note: this manuscript has been previously reviewed at another journal that is not operating a transparent peer review scheme. This document only contains reviewer comments and rebuttal letters for versions considered at Nature Communications.
